# Supplementary material for: Global Alignment of Pairwise Protein Interaction Networks for Maximal Common Conserved Patterns
Source: Int J Genomics. 2013 Mar 27;2013:670623. doi: 10.1155/2013/670623 (PMC3654364; doi:10.1155/2013/670623)
Supplement: Supplementary file 1 — 1. Score[c]=1/3∗S[c]+1/3∗I[c]+1/3∗F[c] where S[c] is the average similarity scores of all nodes in a cluster using BLAST scores or ortholog groups confidence scores, I[c] is the interaction conservation coefficient measured by the total number of interactions in a cluster divided by the |c|(|c|-1)/2, F[c] currently is the interaction over union of number of GO biological process terms covered in a cluster. These are explained the main paper too. 2. 26 clusters of Yeast-Fly pair (excel sheet “ScoreFor26ClustersYeastFly” ) are obtained using Hopmap with KO groups, also sheet “STM_ECO58ClustersScores”, “ECO_CCR42 ClustersScores”. 3. 79 clusters of Yeast-Fly (excel sheet “SoreFor79Clusters”) are obtained using Hopmap and data from NetworkBLAST. 4. GO termFinder results for each pair are provided, including excel sheet “YeastFlyIn26ClustersGO0.05”, “YeastFlyIn117ClustersGO”, and “YeastFly79ClusterGO0.05”, “Graemlin1.0Sce_Dme”, “Graemlin1.0ECO_STMGOResults”, “Graemlin1.0CCR_ECOGOresults”, as their sheet names suggest. 5. P-value for S[c]=(r+1)/(n+1) where r is the number of protein pairs which are in the same KO groups, n is the total number of possible pairs. 6. P-value for I[c]=(r+1)/(n+1) where r is the number of clusters which have values greater than or equal to the value of the actual cluster, n is the total number of random sample clusters 7. P-value for F[c]=(r+1)/(n+1) where r is the number of clusters which have values greater than or equal to the value of intersection over union of the number of GO terms in the cluster, n is the total number of random sample clusters 8. In all cases, n is large enough (3000-5000) so that the result will be statistically meaningful. [file 670623.f1.xls]

## Sheet: Readme
1	Score[c]=1/3*S[c]+1/3*I[c]+1/3*F[c] where S[c] is the average similarity scores of all nodes in a cluster using BLAST scores or ortholog groups confidence scores
				I[c] is the interaction conservation coefficient measured by the total number of interactions in a cluster divided by the |c|(|c|-1)/2, cliqueness
				F[c] currently is the interaction over union of number of GO biological process terms covered in a cluster
2	26 clusters obtained using Hopfmap with KO groups
3	79 clusters obtained using Hopfmap and data from NetworkBLAST
	GO termFinder results for each pair are provided
4	P-value	of S[c]: (r+1)/(n+1) where r is the number of protein pairs which are in the same KO groups, n is the total number of possible pairs.
5	P-value of I[c]: (r+1)/(n+1) where r is the number of clusters which have values greater than or equal to the value of the actual cluster, n is the total number of random sample clusters
6	P-value of F[c]: (r+1)/(n+1) where r is the number of clusters which have values greater than or equal to the value of intersection over union of the number of GO terms in the cluster, n is the total number of random sample clusters
	In all cases, n is large enough (3000-5000) so that the result will be statistically meaningful

## Sheet: ScoresFor26ClustersYeastFly
cluster ID	Cluster size	Cluster size distr.	S[c] blast	S[c] in KO	Pvalue S[c]	I[c]	Pvalue I[c] Yeast 5000 sample	Pvalue I[c] Yeast 1000 sample	Pvalue I[c] fly	I[c] Pvalue	(S[c]+I[c])/2	Yeast GO I/U	PvalueYeast I/U	Fly GO Pro I/U	PvalueFly I/U	F[c]	F[c] Pvalue	Yeast Scores	Fly Scores	Yeast P-value scores	Fly P-value Scores	GO p-value Yeast <0.05	GO p-value Fly <0.05	GO p-value Yeast <0.01	GO p-value Fly <0.01	GO P-value yeast
1	2	2	0.612	1	4.90459e-05	1	0.0016	0.002	0.001	0.0013	0.806	0	1	0	1	0	1	0.5373	0.5373	0.333783	0.333783	1	1	1	1	0.00638
2	2	3	1	1	4.90459e-05	1	0.0008	0.002	0.0006	0.0007	1	0	1	0	1	0	1	0.6667	0.6667	0.333583	0.333583	0	1	0	0
3	2	4	1	1	4.90459e-05	1	0.0012	0.002	0.001	0.0011	1	0.25	0.0414	0	1	0.125	0.5207	0.75	0.6667	0.17395	0.333716	1	0	1	0	4.53e-06
4	5	5	1	1	4.90459e-05	0.4	0.0002	0.001	0.0002	0.0002	0.7	0.5833	0.0002	0.3333	0.0002	0.4583	0.0002	0.6611	0.5778	0.000149682	0.000149682	1	1	1	1	1.17e-13
5	5	6	1	1	4.90459e-05	0.4	0.0002	0.001	0.0002	0.0002	0.7	0.5833	0.0002	0.3333	0.0002	0.4583	0.0002	0.6611	0.5778	0.000149682	0.000149682	1	1	1	1	1.17e-13
6	3		0.3919	1	4.90459e-05	0.6667	0.0002	0.001	0.0002	0.0002	0.5293	0	1	0	1	0	1	0.3528	0.3528	0.333416	0.333416	1	1	1	1	1.36e-06
7	2		0.5003	1	4.90459e-05	1	0.0018	0.003	0.0006	0.0012	0.75015	0.7	0.0142	0	1	0.35	0.5071	0.7334	0.5001	0.16945	0.33375	1	0	0	0
8	2		0.3764	1	4.90459e-05	1	0.0018	0.005	0.0008	0.0013	0.6882	0.5	0.0232	0.25	0.0048	0.375	0.014	0.6255	0.5421	0.00511635	0.00204968	1	1	1	1	8.61e-05
9	2		0.5441	1	4.90459e-05	1	0.0022	0.003	0.001	0.0016	0.77205	0.375	0.0258	0.3333	0.0044	0.35415	0.0151	0.6397	0.6258	0.00558302	0.00201635	1	1	1	1	9.05e-05
10	2		0.3036	1	4.90459e-05	1	0.0018	0.004	0.0014	0.0016	0.6518	0.5	0.024	0	1	0.25	0.512	0.6012	0.4345	0.171216	0.333883	1	1	0	0
11	3		0.6322	1	4.90459e-05	0.6667	0.0004	0.001	0.0002	0.0003	0.64945	0.4	0.0024	0.5	0.0002	0.45	0.0013	0.5663	0.5996	0.000549682	0.000183015	1	1	1	1	0.00143
12	2		0.4374	1	4.90459e-05	1	0.0014	0.002	0.001	0.0012	0.7187	1	0.012	0.5	0.0028	0.75	0.0074	0.8125	0.6458	0.00288302	0.00134968	0	1	0	1
13	2		0.5608	1	4.90459e-05	1	0.001	0.002	0.0002	0.0006	0.7804	1	0.013	0	1	0.5	0.5065	0.8536	0.5203	0.16905	0.33355	1	1	1	1	0.0004
14	2		0.2865	1	4.90459e-05	1	0.002	0.003	0.001	0.0015	0.64325	1	0.0162	0.3333	0.0048	0.66665	0.0105	0.7622	0.5399	0.00401635	0.00211635	1	1	0	0
15	6		0.4845	1	4.90459e-05	0.8667	0.0002	0.001	0.0002	0.0002	0.6756	0.9	0.0002	0.1	0.0002	0.5	0.0002	0.7504	0.4837	0.000149682	0.000149682	1	1	1	1	1.98e-11
16	4		0.4593	1	4.90459e-05	0.8333	0.0002	0.001	0.0002	0.0002	0.6463	0.2143	0.001	0	1	0.10715	0.5005	0.5023	0.4309	0.166916	0.333416	1	1	1	1	5.7e-08
17	2		0.4374	1	4.90459e-05	1	0.0008	0.003	0.0014	0.0011	0.7187	0.6667	0.0148	0.3333	0.0052	0.5	0.01	0.7014	0.5902	0.00371635	0.00211635	1	1	1	1	0.0002
18	2		0.4587	1	4.90459e-05	1	0.001	0.002	0.0008	0.0009	0.72935	1	0.017	1	0.0016	1	0.0093	0.8196	0.8196	0.00341635	0.000849682	1	1	1	1	0.00103
19	2		0.3917	1	4.90459e-05	1	0.0022	0.002	0.001	0.0016	0.69585	1	0.0122	0.0667	0.0058	0.53335	0.009	0.7972	0.4861	0.00354968	0.00248302	1	1	1	1	0.00091
20	2		0.4408	1	4.90459e-05	1	0.0012	0.001	0.0022	0.0017	0.7204	0.75	0.0154	0.5	0.0024	0.625	0.0089	0.7303	0.6469	0.00354968	0.00138302	1	1	1	1	6.65e-05
21	2		0.5349	1	4.90459e-05	1	0.0014	0.002	0.0006	0.001	0.76745	1	0.0134	1	0.0022	1	0.0078	0.845	0.845	0.00294968	0.00108302	1	1	1	1	6.65e-05
22	2		1	1	4.90459e-05	1	0.0016	0.003	0.0008	0.0012	1	0	1	0	1	0	1	0.6667	0.6667	0.33375	0.33375	1	0	0	0
23	3		0.4471	1	4.90459e-05	0.6667	0.0004	0.001	0.0002	0.0003	0.5569	0.6667	0.0012	1	0.0004	0.83335	0.0008	0.5935	0.7046	0.000383015	0.000249682	1	1	1	1	2.12e-07
24	2		0.6744	1	4.90459e-05	1	0.0014	0.003	0.0014	0.0014	0.8372	1	0.0174	0.5	0.0042	0.75	0.0108	0.8915	0.7248	0.00408302	0.00188302	1	1	1	1	2.07e-05
25	2		0.3834	1	4.90459e-05	1	0.0014	0.003	0.0014	0.0014	0.6917	0	1	0	1	0	1	0.4611	0.4611	0.333816	0.333816	1	1	1	1	0.00093
26	2		0.4347	1	4.90459e-05	1	0.0012	0.001	0.0004	0.0008	0.71735	0.5	0.0228	0.1667	0.0024	0.33335	0.0126	0.6449	0.5338	0.00448302	0.00108302	1	1	1	1	1.05e-05
	67
	S[C]	KO groups	p-value
		1664	0.000600962

## Sheet: YeastFlyIn26ClustersGO0.05
1	Yeast_fly_Yeast GO 0.05 Results				0.923077		distinct GO terms		196		avg. significance of all subnet			0.9103
	list file	time	time	results	list file	time	time	results	list file	time	time	results
		submitted	completed			submitted	completed			submitted	completed
	...5AllGenes.txt	2	90	Terms found.	...7AllGenes.txt	3	89	Terms found.	...8AllGenes.txt	4	91	Terms found.
	...4AllGenes.txt	6	92	Terms found.	...0AllGenes.txt	7	93	Terms found.	...1AllGenes.txt	8	91	Terms found.
	...6AllGenes.txt	9	89	Terms found.	...6AllGenes.txt	10	92	Terms found.	...9AllGenes.txt	12	91	Terms found.
	...1AllGenes.txt	14	93	Terms found.	...2AllGenes.txt	15	72	Terms found.	...3AllGenes.txt	16	91	Terms found.
	...5AllGenes.txt	17	90	Terms found.	...6AllGenes.txt	18	92	Terms found.	...9AllGenes.txt	20	92	Terms found.
	...0AllGenes.txt	21	90	Terms found.	...3AllGenes.txt	23	90	Terms found.	...4AllGenes.txt	24	92	Terms found.
	...5AllGenes.txt	26	91	Terms found.	...7AllGenes.txt	27	89	Terms found.	...8AllGenes.txt	28	90	Terms found.
	...1AllGenes.txt	29	90	Terms found.	...3AllGenes.txt	32	91	Terms found.	...4AllGenes.txt	33	89	Terms found.
	...2AllGenes.txt	22	89	No significant terms were found.	...2AllGenes.txt	31	92	No significant terms were found.
2	Fly		23 out of 26		0.884615		distinct GO terms		106		avg. significance of all subnet			0.7808
	list file	time	time	results	list file	time	time	results	list file	time	time	results
		submitted	completed			submitted	completed			submitted	completed
	...3AllGenes.txt	3	105	Terms found.	...4AllGenes.txt	5	110	Terms found.	...5AllGenes.txt	6	112	Terms found.
	...6AllGenes.txt	7	113	Terms found.	...1AllGenes.txt	10	110	Terms found.	...2AllGenes.txt	12	95	Terms found.
	...4AllGenes.txt	16	111	Terms found.	...5AllGenes.txt	17	112	Terms found.	...6AllGenes.txt	18	78	Terms found.
	...8AllGenes.txt	22	106	Terms found.	...9AllGenes.txt	23	111	Terms found.	...0AllGenes.txt	25	111	Terms found.
	...1AllGenes.txt	27	106	Terms found.	...2AllGenes.txt	29	105	Terms found.	...3AllGenes.txt	31	106	Terms found.
	...4AllGenes.txt	32	112	Terms found.	...5AllGenes.txt	33	111	Terms found.	...6AllGenes.txt	35	94	Terms found.
	...7AllGenes.txt	36	105	Terms found.	...8AllGenes.txt	38	106	Terms found.	...9AllGenes.txt	40	112	Terms found.
	...0AllGenes.txt	41	110	Terms found.	...1AllGenes.txt	42	104	Terms found.	...2AllGenes.txt	1	105	No significant terms were found.
	...3AllGenes.txt	14	112	No significant terms were found.	...7AllGenes.txt	21	111	No significant terms were found.
	Shared disticnt GO terms
	Cluster ID	#GO shared
	1	0
	2	0
	3	0
	4	5
	5	5
	6	5
	7	0
	8	7
	9	3
	10	1
	11	2
	12	0
	13	1
	14	1
	15	7
	16	22
	17	18
	18	18
	19	17
	20	17
	21	17
	22	0
	23	5
	24	6
	25	6
	26	11

## Sheet: ScoreFor79Clusters
Cluster ID	Cluster size	S[c] blast	S[c] INPARA	S[c] Pvalue	I[c]	Pvalue Sce I[c]	Pvalue Dme I[c]	Pvalue I[c]	GO I/U yeast	GO I/U Sce Pvalue	GO I/U fly	GO I/U Fly Pvalue	F[c]	F[c] Pvalue	SCE Pvalue	Dme Pvalue	GO sens<0.05 Yeast	GO sens<0.05 Fly		Cluster size distr.
1	50	1	1	6.80457e-05	0.1004	0.0002	0.0002	0.0002	0	1	0	1	0	1	0.333423	0.333423	1	1		2
2	2	0.4709	1	6.80457e-05	1	0.001	0.001	0.001	0.6667	0.0148	0.4	0.0022	0.53335	0.0085	0.00318935	0.00318935	1	1		3
3	5	0.8239	1	6.80457e-05	0.4	0.0002	0.0002	0.0002	0	1	0	1	0	1	0.333423	0.333423	1	1		4
4	4	0.5911	1	6.80457e-05	0.8333	0.0002	0.0002	0.0002	0.125	0.0004	0	1	0.0625	0.5002	0.166823	0.166823	1	1		5
5	2	0.8108	1	6.80457e-05	1	0.001	0.001	0.001	0	1	0	1	0	1	0.333689	0.333689	0	0		7
6	2	0.4609	1	6.80457e-05	1	0.0018	0.002	0.0019	0	1	0	1	0	1	0.333989	0.333956	0	1		50
7	2	0.5226	1	6.80457e-05	1	0.002	0.0012	0.0016	1	0.0134	0.0667	0.0068	0.53335	0.0101	0.00392268	0.00405602	1	1
8	2	0.4167	1	6.80457e-05	1	0.001	0.0014	0.0012	0.7	0.0156	0	1	0.35	0.5078	0.169689	0.169623	0	0			possible pairs in INPARANOID	total pairs	avg
9	2	0.4155	1	6.80457e-05	1	0.0022	0.0008	0.0015	0	1	0	1	0	1	0.333856	0.334089	0	1		yeast	2384	4738
10	4	0.5007	1	6.80457e-05	0	1	1	1	0	1	0	1	0	1	0.666689	0.666689	0	0		fly	3881	7165
11	2	0.5177	1	6.80457e-05	1	0.0006	0.0024	0.0015	0	1	0	1	0	1	0.333856	0.333556	0	0			2310	33947770	6.80457e-05
12	2	0.4342	1	6.80457e-05	1	0.0022	0.0004	0.0013	0.2308	0.0434	0.1667	0.0044	0.19875	0.0239	0.00842268	0.00872268	1	1
13	2	0.6096	1	6.80457e-05	1	0.0012	0.0012	0.0012	0.5	0.0222	0	1	0.25	0.5111	0.170789	0.170789	1	0
14	3	0.45	1	6.80457e-05	1	0.0002	0.0002	0.0002	0	1	0	1	0	1	0.333423	0.333423	1	0
15	3	0.3164	1	6.80457e-05	1	0.0002	0.0002	0.0002	0.3333	0.004	0	1	0.16665	0.502	0.167423	0.167423	1	1
16	2	0.4819	1	6.80457e-05	1	0.001	0.0006	0.0008	0	1	0	1	0	1	0.333623	0.333689	0	0
17	3	0.8749	1	6.80457e-05	0.6667	0.0002	0.0002	0.0002	0.9	0.002	0.1	0.0002	0.5	0.0011	0.000456015	0.000456015	1	1
18	2	1	1	6.80457e-05	1	0.0016	0.001	0.0013	0.1667	0.054	0	1	0.08335	0.527	0.176123	0.176223	0	0
19	2	1	1	6.80457e-05	1	0.0008	0.0012	0.001	1	0.0132	0.5	0.0024	0.75	0.0078	0.00295602	0.00288935	1	1
20	2	1	1	6.80457e-05	1	0.0008	0.0018	0.0013	1	0.0136	0.3333	0.0036	0.66665	0.0086	0.00332268	0.00315602	0	1
21	2	0.4031	1	6.80457e-05	1	0.0012	0.0008	0.001	0.5	0.0236	0	1	0.25	0.5118	0.170956	0.171023	1	0
22	3	1	1	6.80457e-05	1	0.0002	0.0002	0.0002	0.8333	0.0018	0.1667	0.0002	0.5	0.001	0.000422682	0.000422682	1	1
23	3	0.2748	1	6.80457e-05	0.6667	0.0002	0.0002	0.0002	0.1333	0.007	0	1	0.06665	0.5035	0.167923	0.167923	1	1
24	5	0.4278	1	6.80457e-05	0.3	0.0002	0.0002	0.0002	0	1	0	1	0	1	0.333423	0.333423	1	1
25	2	1	1	6.80457e-05	1	0.0022	0.0018	0.002	0.5	0.0248	0	1	0.25	0.5124	0.171489	0.171556	1	0
26	3	1	1	6.80457e-05	1	0.0002	0.0002	0.0002	0.2727	0.0038	0.0909	0.0002	0.1818	0.002	0.000756015	0.000756015	1	1
27	2	1	1	6.80457e-05	1	0.0026	0.0008	0.0017	0	1	0	1	0	1	0.333923	0.334223	0	0
28	2	1	1	6.80457e-05	1	0.0014	0.001	0.0012	0.8	0.0132	1	0.0016	0.9	0.0074	0.00288935	0.00295602	1	1
29	2	1	1	6.80457e-05	1	0.002	0.001	0.0015	0.5	0.02	0	1	0.25	0.51	0.170523	0.170689	1	0
30	3	1	1	6.80457e-05	0.6667	0.0004	0.0002	0.0003	0.4	0.0026	0.5	0.0002	0.45	0.0014	0.000589349	0.000622682	1	1
31	2	1	1	6.80457e-05	1	0.0014	0.0014	0.0014	0	1	0	1	0	1	0.333823	0.333823	0	0
32	5	1	1	6.80457e-05	0.4	0.0002	0.0002	0.0002	0	1	0	1	0	1	0.333423	0.333423	1	0
33	5	0.5145	1	6.80457e-05	0.7	0.0002	0.0002	0.0002	0.1429	0.0002	0	1	0.07145	0.5001	0.166789	0.166789	1	1
34	2	1	1	6.80457e-05	1	0.001	0.0004	0.0007	0.75	0.0136	0	1	0.375	0.5068	0.169189	0.169289	1	0
35	2	0.3298	1	6.80457e-05	1	0.0014	0.0012	0.0013	0.3333	0.0362	0	1	0.16665	0.5181	0.173156	0.173189	0	0
36	4	0.7558	1	6.80457e-05	0.5	0.0002	0.0002	0.0002	0	1	0	1	0	1	0.333423	0.333423	1	1
37	2	0.5653	1	6.80457e-05	1	0.0014	0.0004	0.0009	0.4444	0.0256	0	1	0.2222	0.5128	0.171256	0.171423	1	0
38	2	0.3537	1	6.80457e-05	1	0.002	0.0008	0.0014	1	0.0152	0	1	0.5	0.5076	0.169689	0.169889	1	0
39	2	0.2702	1	6.80457e-05	1	0.0012	0.0014	0.0013	1	0.0144	0	1	0.5	0.5072	0.169523	0.169489	0	1
40	2	0.9234	1	6.80457e-05	1	0.0008	0.001	0.0009	1	0.0134	0.5	0.0022	0.75	0.0078	0.00292268	0.00288935	0	1
41	2	1	1	6.80457e-05	1	0.001	0.001	0.001	0	1	0	1	0	1	0.333689	0.333689	0	0
42	3	0.6348	1	6.80457e-05	0.6667	0.0002	0.0004	0.0003	0.6667	0.001	0	1	0.33335	0.5005	0.166956	0.166923	1	0
43	2	0.6582	1	6.80457e-05	1	0.0016	0.0012	0.0014	0.6667	0.0146	1	0.0012	0.83335	0.0079	0.00312268	0.00318935	1	0
44	2	0.4621	1	6.80457e-05	1	0.0006	0.001	0.0008	0.6667	0.0152	1	0.0016	0.83335	0.0084	0.00308935	0.00302268	1	0
45	2	0.6614	1	6.80457e-05	1	0.0016	0.0014	0.0015	0.125	0.0598	0	1	0.0625	0.5299	0.177156	0.177189	1	1
46	2	0.6238	1	6.80457e-05	1	0.0018	0.0014	0.0016	0.75	0.0144	0.5	0.002	0.625	0.0082	0.00328935	0.00335602	1	1
47	4	0.9546	1	6.80457e-05	0.5	0.0002	0.0002	0.0002	0	1	0	1	0	1	0.333423	0.333423	1	0
48	2	0.5721	1	6.80457e-05	1	0.002	0.0008	0.0014	0.2632	0.036	0.1	0.0052	0.1816	0.0206	0.00735602	0.00755602	1	1
49	2	0.4878	1	6.80457e-05	1	0.0012	0.0006	0.0009	1	0.015	0.5	0.0022	0.75	0.0086	0.00318935	0.00328935	0	1
50	2	0.5267	1	6.80457e-05	1	0.0014	0.0012	0.0013	0.3333	0.0346	0.5	0.0018	0.41665	0.0182	0.00652268	0.00655602	1	1
51	3	0.4971	1	6.80457e-05	0	1	1	1	0	1	0	1	0	1	0.666689	0.666689	0	0
52	3	0.4962	1	6.80457e-05	0.6667	0.0002	0.0002	0.0002	0	1	0	1	0	1	0.333423	0.333423	0	1
53	2	0.6116	1	6.80457e-05	1	0.0012	0.0012	0.0012	0.5	0.0236	0.1667	0.0046	0.33335	0.0141	0.00512268	0.00512268	1	1
54	2	0.3737	1	6.80457e-05	1	0.001	0.0012	0.0011	0	1	0	1	0	1	0.333723	0.333689	0	0
55	2	0.6541	1	6.80457e-05	1	0.0008	0.001	0.0009	1	0.0184	0.5	0.0014	0.75	0.0099	0.00362268	0.00358935	0	1
56	2	0.5255	1	6.80457e-05	0	1	1	1	0	1	0	1	0	1	0.666689	0.666689	0	0
57	2	0.6541	1	6.80457e-05	1	0.0008	0.0014	0.0011	1	0.0122	0.3333	0.0028	0.66665	0.0075	0.00288935	0.00278935	0	1
58	2	0.7847	1	6.80457e-05	1	0.001	0.0006	0.0008	0.3333	0.0348	0.5	0.0032	0.41665	0.019	0.00662268	0.00668935	1	0
59	2	0.6559	1	6.80457e-05	1	0.0014	0.0006	0.001	0	1	0	1	0	1	0.333689	0.333823	0	1
60	3	0.7936	1	6.80457e-05	0.6667	0.0002	0.0002	0.0002	0	1	0	1	0	1	0.333423	0.333423	0	0
61	2	0.7626	1	6.80457e-05	1	0.0012	0.0018	0.0015	0.6667	0.0128	0	1	0.33335	0.5064	0.169323	0.169223	1	0
62	2	0.8565	1	6.80457e-05	1	0.0012	0.0014	0.0013	1	0.0162	0	1	0.5	0.5081	0.169823	0.169789	1	0
63	2	0.9074	1	6.80457e-05	1	0.002	0.0006	0.0013	0.75	0.0158	0.4	0.0022	0.575	0.009	0.00345602	0.00368935	1	1
64	2	0.6605	1	6.80457e-05	1	0.0014	0.0008	0.0011	0.8	0.0154	0	1	0.4	0.5077	0.169623	0.169723	1	0
65	2	1	1	6.80457e-05	1	0.0012	0.0014	0.0013	0.7	0.013	0	1	0.35	0.5065	0.169289	0.169256	1	0
66	2	0.7585	1	6.80457e-05	1	0.0014	0.001	0.0012	0	1	0	1	0	1	0.333756	0.333823	1	0
67	2	0.447	1	6.80457e-05	1	0.0028	0.0016	0.0022	0.5	0.023	0.1333	0.0052	0.31665	0.0141	0.00545602	0.00565602	1	1
68	2	1	1	6.80457e-05	1	0.0018	0.001	0.0014	0.75	0.0146	0.3	0.004	0.525	0.0093	0.00358935	0.00372268	0	1
69	3	0.775	1	6.80457e-05	0.6667	0.0002	0.0002	0.0002	0.4286	0.0022	0	1	0.2143	0.5011	0.167123	0.167123	1	0
70	3	0.9592	1	6.80457e-05	0.6667	0.0002	0.0002	0.0002	1	0.0016	1	0.0004	1	0.001	0.000422682	0.000422682	1	1
71	7	0.8742	1	6.80457e-05	0.619	0.0002	0.0002	0.0002	0.5	0.0002	0	1	0.25	0.5001	0.166789	0.166789	1	1
72	2	0.4947	1	6.80457e-05	1	0.0014	0.0006	0.001	0.3333	0.032	0.3333	0.0042	0.3333	0.0181	0.00638935	0.00652268	1	1
73	2	0.365	1	6.80457e-05	1	0.0022	0.001	0.0016	0.6	0.014	0	1	0.3	0.507	0.169556	0.169756	1	0
74	4	0.6771	1	6.80457e-05	0.6667	0.0002	0.0002	0.0002	1	0.0002	0	1	0.5	0.5001	0.166789	0.166789	1	1
75	2	0.8923	1	6.80457e-05	1	0.0018	0.0014	0.0016	1	0.0136	1	0.0016	1	0.0076	0.00308935	0.00315602	1	1
76	2	0.764	1	6.80457e-05	1	0.0024	0.0008	0.0016	1	0.0154	0.5	0.0026	0.75	0.009	0.00355602	0.00382268	1	1
77	2	0.753	1	6.80457e-05	1	0.0012	0.0014	0.0013	1	0.013	0	1	0.5	0.5065	0.169289	0.169256	1	0
78	2	0.7713	1	6.80457e-05	1	0.002	0.0016	0.0018	0.8	0.0154	0.3333	0.0038	0.56665	0.0096	0.00382268	0.00388935	1	1
79	3	0.6443	1	6.80457e-05	0.6667	0.0002	0.0002	0.0002	0.6667	0.0016	0.5	0.0002	0.58335	0.0009	0.000389349	0.000389349	1	1
	247

## Sheet: STM_ECO58ClustersScores
Cluster ID	Cluster size	S[c] In KO	Pvalue S[c]	I[c]	Pvalue I[c] STM	Pvalue I[c] ECO	Pvalue I[c]	STM GO I/U	ECO GO I/U	STM I/U Pvalue	ECO I/U Pvalue	F[c] Pvalue	STM score Pvalue	ECO score Pvalue	STM GO sensitivity<0.05	ECO GO pro<0.05
1	6	1	0.00018261	0.8	0.00019996	0.00019996	0.00019996	0.4	0.4	0.60008	0.00019996	0.30014	0.100174	0.100174	1	1			possible pairs in INPARANOID	total pairs	avg
2	177	1	0.00018261	0.0947	0.00479904	0.00019996	0.0024995	0	0	0.60008	0.60008	0.60008	0.200921	0.200921	1	1		ECO	2461	4121
3	11	1	0.00018261	0.3636	0.00019996	0.00019996	0.00019996	0	0	0.00019996	0.60008	0.30014	0.100174	0.100174	0	1		STM	2186	4239
4	12	1	0.00018261	0.5303	0.00019996	0.00019996	0.00019996	0	0	0.60008	0.60008	0.60008	0.200154	0.200154	1	1			3190	17468919	0.00018261
5	4	1	0.00018261	1	0.00019996	0.00019996	0.00019996	0	1	0.00019996	0.00019996	0.00019996	0.000194177	0.000194177	1	1
6	8	1	0.00018261	0.4286	0.00019996	0.00019996	0.00019996	0	0	0.00019996	0.60008	0.30014	0.100174	0.100174	1	1
7	280	1	0.00018261	0.0378	0.00479904	0.00019996	0.0024995	0	0	0.60008	0.60008	0.60008	0.200921	0.200921	1	1
8	97	1	0.00018261	0.0846	0.00479904	0.00019996	0.0024995	0	0	0.60008	0.60008	0.60008	0.200921	0.200921	1	1
9	3	1	0.00018261	1	0.00019996	0.00019996	0.00019996	0	1	0.60008	0.60008	0.60008	0.200154	0.200154	1	1
10	4	1	0.00018261	0.8333	0.00019996	0.00019996	0.00019996	0	0	0.00039992	0.60008	0.30024	0.100208	0.100208	1	1
11	5	1	0.00018261	0.6	0.00019996	0.00019996	0.00019996	0	0	0.00019996	0.00019996	0.00019996	0.000194177	0.000194177	0	1
12	7	1	0.00018261	0.2857	0.00019996	0.00019996	0.00019996	0	0	0.00019996	0.60008	0.30014	0.100174	0.100174	0	1
13	4	1	0.00018261	0.6667	0.00019996	0.00019996	0.00019996	0	0	0.00019996	0.60008	0.30014	0.100174	0.100174	0	0
14	4	1	0.00018261	0.5	0.00019996	0.00019996	0.00019996	0	0	0.00019996	0.00019996	0.00019996	0.000194177	0.000194177	1	0
15	6	1	0.00018261	0.5333	0.00019996	0.00019996	0.00019996	0.25	0.25	0.60008	0.00019996	0.30014	0.100174	0.100174	1	1
16	4	1	0.00018261	0.6667	0.00019996	0.00019996	0.00019996	0.25	0.5	0.60008	0.00019996	0.30014	0.100174	0.100174	1	1
17	4	1	0.00018261	1	0.00019996	0.00019996	0.00019996	0	0	0.60008	0.00019996	0.30014	0.100174	0.100174	1	1
18	22	1	0.00018261	0.6277	0.00019996	0.00019996	0.00019996	0	0	0.60008	0.60008	0.60008	0.200154	0.200154	1	1
19	20	1	0.00018261	0.2526	0.00019996	0.00019996	0.00019996	0	0	0.60008	0.60008	0.60008	0.200154	0.200154	1	1
20	8	1	0.00018261	0.75	0.00019996	0.00019996	0.00019996	0	0	0.60008	0.60008	0.60008	0.200154	0.200154	1	1
21	5	1	0.00018261	0.8	0.00019996	0.00019996	0.00019996	0	0	0.60008	0.60008	0.60008	0.200154	0.200154	0	0
22	3	1	0.00018261	1	0.00019996	0.00019996	0.00019996	0	0	0.00019996	0.00019996	0.00019996	0.000194177	0.000194177	0	0
23	9	1	0.00018261	0.75	0.00019996	0.00019996	0.00019996	0.75	1	0.60008	0.60008	0.60008	0.200154	0.200154	1	1
24	9	1	0.00018261	0.75	0.00019996	0.00019996	0.00019996	1	1	0.60008	0.60008	0.60008	0.200154	0.200154	1	1
25	3	1	0.00018261	1	0.00019996	0.00019996	0.00019996	0	0	0.60008	0.00079984	0.30044	0.100274	0.100274	1	1
26	5	1	0.00018261	0.5	0.00019996	0.00019996	0.00019996	0	0	0.60008	0.60008	0.60008	0.200154	0.200154	1	1
27	3	1	0.00018261	1	0.00019996	0.00019996	0.00019996	0	1	0.00019996	0.0009998	0.00059988	0.000327483	0.000327483	0	1
28	3	1	0.00018261	0.6667	0.00019996	0.00039992	0.00029994	0.3333	0.75	0.00019996	0.00039992	0.00029994	0.00026083	0.00026083	0	1
29	3	1	0.00018261	0.6667	0.00039992	0.00039992	0.00039992	0.3333	0.75	0.00019996	0.00019996	0.00019996	0.00026083	0.00026083	0	1
30	4	1	0.00018261	0.6667	0.00019996	0.00019996	0.00019996	0.25	1	0.00019996	0.00019996	0.00019996	0.000194177	0.000194177	1	1
31	10	1	0.00018261	0.4444	0.00019996	0.00019996	0.00019996	0.5	0.5	0.00019996	0.00019996	0.00019996	0.000194177	0.000194177	1	1
32	6	1	0.00018261	0.5333	0.00019996	0.00019996	0.00019996	0.5	1	0.60008	0.60008	0.60008	0.200154	0.200154	1	1
33	3	1	0.00018261	1	0.00019996	0.00019996	0.00019996	0	0	0.00019996	0.00019996	0.00019996	0.000194177	0.000194177	0	1
34	3	1	0.00018261	1	0.00039992	0.00019996	0.00029994	1	0	0.00039992	0.00019996	0.00029994	0.00026083	0.00026083	1	1
35	4	1	0.00018261	1	0.00019996	0.00019996	0.00019996	0	0.25	0.00019996	0.00019996	0.00019996	0.000194177	0.000194177	1	1
36	7	1	0.00018261	0.4762	0.00019996	0.00019996	0.00019996	0	0	0.00019996	0.60008	0.30014	0.100174	0.100174	0	1
37	3	1	0.00018261	1	0.00019996	0.00019996	0.00019996	0	0	0.00019996	0.00019996	0.00019996	0.000194177	0.000194177	1	1
38	3	1	0.00018261	1	0.00019996	0.00019996	0.00019996	0	0	0.60008	0.60008	0.60008	0.200154	0.200154	1	1
39	4	1	0.00018261	0.6667	0.00019996	0.00019996	0.00019996	0	0	0.00019996	0.60008	0.30014	0.100174	0.100174	1	1
40	14	1	0.00018261	0.5275	0.00019996	0.00019996	0.00019996	0	0	0.60008	0.60008	0.60008	0.200154	0.200154	1	1
41	12	1	0.00018261	0.6818	0.00019996	0.00019996	0.00019996	1	1	0.60008	0.00019996	0.30014	0.100174	0.100174	1	1
42	3	1	0.00018261	1	0.00019996	0.00039992	0.00029994	0	0	0.60008	0.60008	0.60008	0.200188	0.200188	1	1
43	5	1	0.00018261	0.6	0.00019996	0.00019996	0.00019996	0	0	0.00019996	0.60008	0.30014	0.100174	0.100174	1	1
44	4	1	0.00018261	0.5	0.00019996	0.00019996	0.00019996	0.5	0.6667	0.00019996	0.00039992	0.00029994	0.000227503	0.000227503	1	1
45	10	1	0.00018261	0.6222	0.00019996	0.00019996	0.00019996	1	0.6667	0.60008	0.60008	0.60008	0.200154	0.200154	1	1
46	10	1	0.00018261	0.6222	0.00019996	0.00019996	0.00019996	0.6667	0.6667	0.00019996	0.00019996	0.00019996	0.000194177	0.000194177	1	1
47	10	1	0.00018261	0.6222	0.00019996	0.00019996	0.00019996	1	0.6667	0.60008	0.60008	0.60008	0.200154	0.200154	1	1
48	10	1	0.00018261	0.8667	0.00019996	0.00019996	0.00019996	0	0	0.60008	0.60008	0.60008	0.200154	0.200154	1	1
49	35	1	0.00018261	0.7563	0.00019996	0.00019996	0.00019996	0.3333	0.25	0.60008	0.60008	0.60008	0.200154	0.200154	1	1
50	10	1	0.00018261	0.5556	0.00019996	0.00019996	0.00019996	0.3333	1	0.60008	0.60008	0.60008	0.200154	0.200154	1	0
51	6	1	0.00018261	0.6	0.00019996	0.00019996	0.00019996	0	0	0.60008	0.60008	0.60008	0.200154	0.200154	0	0
52	3	1	0.00018261	0.6667	0.00039992	0.00039992	0.00039992	0	0	0.60008	0.60008	0.60008	0.200221	0.200221	1	1
53	3	1	0.00018261	1	0.00019996	0.00019996	0.00019996	1	1	0.00019996	0.60008	0.30014	0.100174	0.100174	1	1
54	3	1	0.00018261	0.6667	0.00019996	0.00039992	0.00029994	0	0	0.00019996	0.60008	0.30014	0.100208	0.100208	1	1
55	4	1	0.00018261	0.6667	0.00019996	0.00019996	0.00019996	0	0	0.00019996	0.00019996	0.00019996	0.000194177	0.000194177	1	0
56	3	1	0.00018261	0.6667	0.00019996	0.00019996	0.00019996	1	1	0.00039992	0.60008	0.30024	0.100208	0.100208	1	0
57	3	1	0.00018261	0.6667	0.00019996	0.00039992	0.00029994	1	1	0.60008	0.00019996	0.30014	0.100208	0.100208	1	0
58	4	1	0.00018261	0.6667	0.00019996	0.00019996	0.00019996	0.5	1	0.60008	0.00019996	0.30014	0.100174	0.100174	1	1

## Sheet: ECO_CCR42ClustersScores
	cluster ID	Cluster size	S[c] KO	Pvale S[c]	I[c]	CCR Pvalue I[c]	ECO Pvalue I[c]	Pvalue I[c]	CCR GO I/U	ECO GO I/U	CCR Pvalue I/U	ECO Pvalue I/U	F[c]	F[c] Pvalue	Score Pvalue CCR	Score Pvalue ECO	ECO GO pro sensitvity<0.05	CCR GO pro sensitvity<0.05
	1	2	1	9.84496e-05	1	0.00079984	0.00239952	0.00159968	0	1	0.60008	0.00119976	0.5	0.30064	0.100779	0.100779	1	1
	2	2	1	9.84496e-05	1	0.00079984	0.00219956	0.0014997	0.666667	1	0.00379924	0.0019996	0.833333	0.00289942	0.00149919	0.00149919	1	1		CCR		3362
	3	4	1	9.84496e-05	0.6667	0.00019996	0.00019996	0.00019996	0.666667	0	0.00019996	0.60008	0.333333	0.30014	0.100146	0.100146	1	0		ECO		4121
	4	2	1	9.84496e-05	1	0.00119976	0.00279944	0.0019996	0	0	0.60008	0.60008	0	0.60008	0.200726	0.200726	1	1			1364	13854802	9.84496e-05
	5	2	1	9.84496e-05	1	0.00039992	0.00259948	0.0014997	0	0	0.60008	0.60008	0	0.60008	0.200559	0.200559	0	1
	6	3	1	9.84496e-05	0.6667	0.00019996	0.00019996	0.00019996	0	0	0.60008	0.60008	0	0.60008	0.200126	0.200126	1	1
	7	4	1	9.84496e-05	0.8333	0.00019996	0.00019996	0.00019996	0	0	0.60008	0.60008	0	0.60008	0.200126	0.200126	1	1
	8	2	1	9.84496e-05	1	0.0009998	0.0029994	0.0019996	0	1	0.60008	0.00359928	0.5	0.30184	0.101313	0.101313	1	1
	9	2	1	9.84496e-05	1	0.00079984	0.00259948	0.00169966	1	0	0.00439912	0.60008	0.5	0.30224	0.101346	0.101346	1	1
	10	2	1	9.84496e-05	1	0.00059988	0.0019996	0.00129974	1	0	0.00579884	0.60008	0.5	0.302939	0.101446	0.101446	1	0
	11	2	1	9.84496e-05	1	0.0009998	0.00239952	0.00169966	0.4	0.666667	0.0089982	0.00279944	0.533333	0.00589882	0.00256564	0.00256564	1	1
	12	6	1	9.84496e-05	0.8	0.00019996	0.00019996	0.00019996	0.4	0	0.00019996	0.60008	0.2	0.30014	0.100146	0.100146	1	1
	13	2	1	9.84496e-05	1	0.00079984	0.00159968	0.00119976	1	1	0.00259948	0.00219956	1	0.00239952	0.00123258	0.00123258	1	0
	14	2	1	9.84496e-05	1	0.00079984	0.00319936	0.0019996	1	1	0.00519896	0.0019996	1	0.00359928	0.00189911	0.00189911	1	0
	15	3	1	9.84496e-05	0.6667	0.00019996	0.00019996	0.00019996	0.25	0	0.00039992	0.60008	0.125	0.30024	0.100179	0.100179	1	1
	16	8	1	9.84496e-05	0.6786	0.00019996	0.00019996	0.00019996	0.666667	0	0.00019996	0.60008	0.333333	0.30014	0.100146	0.100146	1	1
	17	2	1	9.84496e-05	1	0.00119976	0.00439912	0.00279944	1	1	0.00519896	0.0029994	1	0.00409918	0.00233236	0.00233236	1	0
	18	2	1	9.84496e-05	1	0.00119976	0.00239952	0.00179964	0.333333	0.333333	0.0133973	0.0129974	0.333333	0.0131974	0.00503182	0.00503182	1	1
	19	2	1	9.84496e-05	1	0.00039992	0.00339932	0.00189962	0	1	0.60008	0.00239952	0.5	0.30124	0.101079	0.101079	1	1
	20	2	1	9.84496e-05	1	0.0009998	0.00279944	0.00189962	1	1	0.0039992	0.0029994	1	0.0034993	0.00183246	0.00183246	0	1
	21	2	1	9.84496e-05	1	0.00119976	0.00219956	0.00169966	0.5	0.333333	0.00639872	0.0141972	0.416667	0.0102979	0.00403202	0.00403202	1	1
	22	2	1	9.84496e-05	1	0.00059988	0.00159968	0.00109978	1	0	0.00459908	0.60008	0.5	0.30234	0.101179	0.101179	1	1
	23	2	1	9.84496e-05	1	0.0009998	0.00239952	0.00169966	1	1	0.00579884	0.00219956	1	0.0039992	0.00193244	0.00193244	1	1
	24	2	1	9.84496e-05	1	0.00079984	0.00159968	0.00119976	1	1	0.00439912	0.00339932	1	0.00389922	0.00173248	0.00173248	1	1
	25	4	1	9.84496e-05	0.8333	0.00019996	0.00019996	0.00019996	0	0	0.60008	0.60008	0	0.60008	0.200126	0.200126	1	1
	26	2	1	9.84496e-05	1	0.00079984	0.00219956	0.0014997	1	0	0.00339932	0.60008	0.5	0.30174	0.101113	0.101113	1	0
	27	4	1	9.84496e-05	0.5	0.00019996	0.00019996	0.00019996	0.75	0	0.00019996	0.60008	0.375	0.30014	0.100146	0.100146	1	0
	28	2	1	9.84496e-05	1	0.00119976	0.00319936	0.00219956	0.285714	1	0.00979804	0.00179964	0.642857	0.00579884	0.00269895	0.00269895	1	1
	29	2	1	9.84496e-05	1	0.00059988	0.0019996	0.00129974	1	1	0.00379924	0.00279944	1	0.00329934	0.00156584	0.00156584	1	1
	30	3	1	9.84496e-05	1	0.00019996	0.00019996	0.00019996	1	0	0.00059988	0.60008	0.5	0.30034	0.100213	0.100213	1	1
	31	2	1	9.84496e-05	1	0.00119976	0.00259948	0.00189962	1	1	0.00579884	0.00239952	1	0.00409918	0.00203242	0.00203242	0	1
	32	2	1	9.84496e-05	1	0.00059988	0.0019996	0.00129974	1	0	0.0039992	0.60008	0.5	0.30204	0.101146	0.101146	1	1
	33	5	1	9.84496e-05	0.6	0.00019996	0.00019996	0.00019996	1	0	0.00019996	0.60008	0.5	0.30014	0.100146	0.100146	1	0
	34	3	1	9.84496e-05	1	0.00019996	0.00019996	0.00019996	1	1	0.00019996	0.00019996	1	0.00019996	0.000166123	0.000166123	1	0
	35	2	1	9.84496e-05	1	0.0009998	0.00239952	0.00169966	1	0	0.00359928	0.60008	0.5	0.30184	0.101213	0.101213	1	0
	36	2	1	9.84496e-05	1	0.00059988	0.00259948	0.00159968	1	0.333333	0.004999	0.015197	0.666667	0.010098	0.00393204	0.00393204	1	0
	37	2	1	9.84496e-05	1	0.00139972	0.00259948	0.0019996	1	0	0.00419916	0.60008	0.5	0.30214	0.101413	0.101413	1	1
	38	2	1	9.84496e-05	1	0.0009998	0.00179964	0.00139972	0	0	0.60008	0.60008	0	0.60008	0.200526	0.200526	0	1
	39	2	1	9.84496e-05	1	0.00039992	0.00279944	0.00159968	0	1	0.60008	0.0029994	0.5	0.30154	0.101079	0.101079	1	1
	40	2	1	9.84496e-05	1	0.00079984	0.0019996	0.00139972	0	1	0.60008	0.0039992	0.5	0.30204	0.101179	0.101179	0	1
	41	2	1	9.84496e-05	1	0.00059988	0.00179964	0.00119976	1	1	0.00419916	0.00139972	1	0.00279944	0.00136588	0.00136588	1	1
	42	2	1	9.84496e-05	1	0.00039992	0.0029994	0.00169966	1	1	0.00459908	0.00259948	1	0.00359928	0.00179913	0.00179913	1	1

## Sheet: YeastFlyIn117ClustersGO
	1	Yeast in 117 Cluster GO results P-value 0.05					67 out of 117		0.57265
		list file	time	time	results	list file	time	time	results	list file	time	time	results
			submitted	completed			submitted	completed			submitted	completed
		...5AllGenes.txt	5	64	Terms found.	...6AllGenes.txt	6	62	Terms found.	...7AllGenes.txt	7	61	Terms found.
		...8AllGenes.txt	9	59	Terms found.	...9AllGenes.txt	10	109	Terms found.	...1AllGenes.txt	12	105	Terms found.
		...2AllGenes.txt	13	85	Terms found.	...4AllGenes.txt	16	82	Terms found.	...0AllGenes.txt	21	73	Terms found.
		...2AllGenes.txt	23	78	Terms found.	...0AllGenes.txt	24	75	Terms found.	...3AllGenes.txt	27	101	Terms found.
		...4AllGenes.txt	28	99	Terms found.	...5AllGenes.txt	30	98	Terms found.	...9AllGenes.txt	35	96	Terms found.
		...0AllGenes.txt	36	95	Terms found.	...1AllGenes.txt	37	93	Terms found.	...2AllGenes.txt	38	92	Terms found.
		...3AllGenes.txt	39	106	Terms found.	...6AllGenes.txt	62	125	Terms found.	...7AllGenes.txt	64	124	Terms found.
		...8AllGenes.txt	65	122	Terms found.	...9AllGenes.txt	66	121	Terms found.	...2AllGenes.txt	75	141	Terms found.
		...3AllGenes.txt	76	132	Terms found.	...4AllGenes.txt	78	140	Terms found.	...8AllGenes.txt	83	135	Terms found.
		...9AllGenes.txt	85	159	Terms found.	...1AllGenes.txt	87	147	Terms found.	...2AllGenes.txt	89	157	Terms found.
		...5AllGenes.txt	93	156	Terms found.	...6AllGenes.txt	95	161	Terms found.	...7AllGenes.txt	96	163	Terms found.
		...9AllGenes.txt	99	153	Terms found.	...1AllGenes.txt	103	172	Terms found.	...4AllGenes.txt	107	169	Terms found.
		...8AllGenes.txt	121	179	Terms found.	...9AllGenes.txt	122	188	Terms found.	...0AllGenes.txt	124	187	Terms found.
		...1AllGenes.txt	125	185	Terms found.	...3AllGenes.txt	128	182	Terms found.	...4AllGenes.txt	133	193	Terms found.
		...5AllGenes.txt	135	206	Terms found.	...6AllGenes.txt	137	204	Terms found.	...8AllGenes.txt	139	201	Terms found.
		...3AllGenes.txt	148	254	Terms found.	...4AllGenes.txt	150	216	Terms found.	...6AllGenes.txt	154	213	Terms found.
		...7AllGenes.txt	156	211	Terms found.	...0AllGenes.txt	160	271	Terms found.	...2AllGenes.txt	164	270	Terms found.
		...3AllGenes.txt	166	226	Terms found.	...4AllGenes.txt	168	270	Terms found.	...5AllGenes.txt	169	269	Terms found.
		...6AllGenes.txt	171	271	Terms found.	...9AllGenes.txt	175	274	Terms found.	...0AllGenes.txt	182	272	Terms found.
		...1AllGenes.txt	184	275	Terms found.	...5AllGenes.txt	190	254	Terms found.	...6AllGenes.txt	192	270	Terms found.
		...7AllGenes.txt	195	273	Terms found.	...8AllGenes.txt	197	274	Terms found.	...9AllGenes.txt	199	271	Terms found.
		...7AllGenes.txt	211	270	Terms found.	...9AllGenes.txt	215	269	Terms found.	...0AllGenes.txt	216	272	Terms found.
		...1AllGenes.txt	218	275	Terms found.	...2AllGenes.txt	1	58	No significant terms were found.	...3AllGenes.txt	3	67	No significant terms were found.
		...4AllGenes.txt	4	65	No significant terms were found.	...0AllGenes.txt	11	107	No significant terms were found.	...3AllGenes.txt	15	84	No significant terms were found.
		...5AllGenes.txt	17	81	No significant terms were found.	...6AllGenes.txt	18	79	No significant terms were found.	...7AllGenes.txt	20	76	No significant terms were found.
		...1AllGenes.txt	22	72	No significant terms were found.	...0AllGenes.txt	26	103	No significant terms were found.	...6AllGenes.txt	31	89	No significant terms were found.
		...7AllGenes.txt	32	87	No significant terms were found.	...8AllGenes.txt	33	90	No significant terms were found.	...4AllGenes.txt	59	118	No significant terms were found.
		...5AllGenes.txt	61	127	No significant terms were found.	...0AllGenes.txt	68	119	No significant terms were found.	...1AllGenes.txt	73	143	No significant terms were found.
		...5AllGenes.txt	79	138	No significant terms were found.	...6AllGenes.txt	81	134	No significant terms were found.	...7AllGenes.txt	82	137	No significant terms were found.
		...3AllGenes.txt	90	150	No significant terms were found.	...4AllGenes.txt	92	149	No significant terms were found.	...8AllGenes.txt	98	154	No significant terms were found.
		...0AllGenes.txt	101	174	No significant terms were found.	...2AllGenes.txt	104	171	No significant terms were found.	...3AllGenes.txt	106	165	No significant terms were found.
		...5AllGenes.txt	109	168	No significant terms were found.	...6AllGenes.txt	110	166	No significant terms were found.	...7AllGenes.txt	119	190	No significant terms were found.
		...2AllGenes.txt	127	184	No significant terms were found.	...7AllGenes.txt	138	202	No significant terms were found.	...9AllGenes.txt	141	199	No significant terms were found.
		...1AllGenes.txt	143	198	No significant terms were found.	...2AllGenes.txt	144	195	No significant terms were found.	...5AllGenes.txt	153	215	No significant terms were found.
		...8AllGenes.txt	157	208	No significant terms were found.	...9AllGenes.txt	159	210	No significant terms were found.	...1AllGenes.txt	163	273	No significant terms were found.
		...7AllGenes.txt	172	274	No significant terms were found.	...8AllGenes.txt	174	255	No significant terms were found.	...2AllGenes.txt	185	255	No significant terms were found.
		...3AllGenes.txt	187	273	No significant terms were found.	...4AllGenes.txt	188	272	No significant terms were found.	...1AllGenes.txt	201	271	No significant terms were found.
		...2AllGenes.txt	202	255	No significant terms were found.	...3AllGenes.txt	204	269	No significant terms were found.	...4AllGenes.txt	206	273	No significant terms were found.
		...5AllGenes.txt	207	275	No significant terms were found.	...6AllGenes.txt	210	273	No significant terms were found.	...8AllGenes.txt	213	272	No significant terms were found.
	2	Fly			62 out of 117		0.529915
		list file	time	time	results	list file	time	time	results	list file	time	time	results
			submitted	completed			submitted	completed			submitted	completed
		...3AllGenes.txt	6	71	Terms found.	...5AllGenes.txt	10	67	Terms found.	...2AllGenes.txt	22	85	Terms found.
		...4AllGenes.txt	26	81	Terms found.	...2AllGenes.txt	33	102	Terms found.	...3AllGenes.txt	34	101	Terms found.
		...4AllGenes.txt	36	99	Terms found.	...8AllGenes.txt	43	120	Terms found.	...1AllGenes.txt	48	116	Terms found.
		...3AllGenes.txt	51	109	Terms found.	...4AllGenes.txt	52	112	Terms found.	...6AllGenes.txt	64	123	Terms found.
		...7AllGenes.txt	67	128	Terms found.	...8AllGenes.txt	68	127	Terms found.	...9AllGenes.txt	71	125	Terms found.
		...2AllGenes.txt	81	144	Terms found.	...3AllGenes.txt	83	143	Terms found.	...5AllGenes.txt	87	141	Terms found.
		...8AllGenes.txt	92	165	Terms found.	...9AllGenes.txt	95	163	Terms found.	...0AllGenes.txt	96	161	Terms found.
		...1AllGenes.txt	98	158	Terms found.	...2AllGenes.txt	99	153	Terms found.	...4AllGenes.txt	102	180	Terms found.
		...7AllGenes.txt	109	170	Terms found.	...8AllGenes.txt	111	174	Terms found.	...1AllGenes.txt	115	171	Terms found.
		...3AllGenes.txt	119	197	Terms found.	...5AllGenes.txt	122	194	Terms found.	...7AllGenes.txt	125	190	Terms found.
		...9AllGenes.txt	128	186	Terms found.	...0AllGenes.txt	130	187	Terms found.	...2AllGenes.txt	140	206	Terms found.
		...3AllGenes.txt	141	204	Terms found.	...4AllGenes.txt	143	199	Terms found.	...5AllGenes.txt	144	203	Terms found.
		...7AllGenes.txt	147	220	Terms found.	...8AllGenes.txt	153	219	Terms found.	...9AllGenes.txt	156	215	Terms found.
		...0AllGenes.txt	158	216	Terms found.	...2AllGenes.txt	162	303	Terms found.	...3AllGenes.txt	165	259	Terms found.
		...4AllGenes.txt	167	237	Terms found.	...6AllGenes.txt	170	234	Terms found.	...3AllGenes.txt	182	244	Terms found.
		...4AllGenes.txt	184	290	Terms found.	...6AllGenes.txt	187	290	Terms found.	...9AllGenes.txt	192	303	Terms found.
		...0AllGenes.txt	193	291	Terms found.	...1AllGenes.txt	195	304	Terms found.	...2AllGenes.txt	197	259	Terms found.
		...5AllGenes.txt	203	259	Terms found.	...7AllGenes.txt	206	302	Terms found.	...8AllGenes.txt	207	303	Terms found.
		...9AllGenes.txt	215	291	Terms found.	...0AllGenes.txt	216	290	Terms found.	...2AllGenes.txt	220	288	Terms found.
		...3AllGenes.txt	222	302	Terms found.	...5AllGenes.txt	231	302	Terms found.	...6AllGenes.txt	233	290	Terms found.
		...7AllGenes.txt	234	291	Terms found.	...1AllGenes.txt	2	74	No significant terms were found.	...2AllGenes.txt	5	63	No significant terms were found.
		...4AllGenes.txt	8	68	No significant terms were found.	...6AllGenes.txt	12	64	No known genes were found.	...7AllGenes.txt	13	92	No significant terms were found.
		...8AllGenes.txt	16	90	No significant terms were found.	...9AllGenes.txt	18	89	No significant terms were found.	...0AllGenes.txt	20	78	No significant terms were found.
		...1AllGenes.txt	21	87	No significant terms were found.	...3AllGenes.txt	24	83	No significant terms were found.	...5AllGenes.txt	27	130	No significant terms were found.
		...6AllGenes.txt	28	122	No significant terms were found.	...7AllGenes.txt	30	108	No significant terms were found.	...1AllGenes.txt	32	105	No significant terms were found.
		...5AllGenes.txt	37	98	No significant terms were found.	...6AllGenes.txt	39	96	No significant terms were found.	...7AllGenes.txt	41	95	No significant terms were found.
		...9AllGenes.txt	44	119	No significant terms were found.	...0AllGenes.txt	46	117	No significant terms were found.	...2AllGenes.txt	49	114	No significant terms were found.
		...5AllGenes.txt	53	111	No significant terms were found.	...0AllGenes.txt	73	138	No significant terms were found.	...1AllGenes.txt	75	146	No significant terms were found.
		...4AllGenes.txt	85	140	No significant terms were found.	...6AllGenes.txt	89	167	No significant terms were found.	...7AllGenes.txt	90	151	No significant terms were found.
		...3AllGenes.txt	101	156	No significant terms were found.	...5AllGenes.txt	105	178	No significant terms were found.	...6AllGenes.txt	108	177	No significant terms were found.
		...9AllGenes.txt	112	173	No significant terms were found.	...0AllGenes.txt	114	168	No significant terms were found.	...2AllGenes.txt	117	183	No significant terms were found.
		...4AllGenes.txt	120	195	No significant terms were found.	...6AllGenes.txt	123	192	No significant terms were found.	...8AllGenes.txt	127	189	No significant terms were found.
		...1AllGenes.txt	131	184	No significant terms were found.	...6AllGenes.txt	146	200	No significant terms were found.	...1AllGenes.txt	161	213	No significant terms were found.
		...5AllGenes.txt	168	236	No significant terms were found.	...7AllGenes.txt	171	233	No significant terms were found.	...8AllGenes.txt	173	229	No significant terms were found.
		...9AllGenes.txt	174	231	No significant terms were found.	...0AllGenes.txt	177	227	No significant terms were found.	...1AllGenes.txt	178	302	No significant terms were found.
		...2AllGenes.txt	180	289	No significant terms were found.	...5AllGenes.txt	186	289	No significant terms were found.	...7AllGenes.txt	189	303	No significant terms were found.
		...8AllGenes.txt	190	260	No significant terms were found.	...3AllGenes.txt	198	302	No significant terms were found.	...4AllGenes.txt	200	291	No significant terms were found.
		...6AllGenes.txt	204	289	No significant terms were found.	...1AllGenes.txt	219	270	No significant terms were found.	...4AllGenes.txt	229	304	No significant terms were found.
		...8AllGenes.txt	236	288	No significant terms were found.	...9AllGenes.txt	237	301	No significant terms were found.	...0AllGenes.txt	239	304	No significant terms were found.

## Sheet: YeastFly79ClusterGO0.05
	1	Fly GO 0.05 Results			44 out of 79		0.556962
		list file	time	time	results	list file	time	time	results	list file	time	time	results
			submitted	completed			submitted	completed			submitted	completed
		...8AllGenes.txt	1	55	Terms found.	...0AllGenes.txt	4	121	Terms found.	...1AllGenes.txt	5	82	Terms found.
		...3AllGenes.txt	7	80	Terms found.	...4AllGenes.txt	8	77	Terms found.	...5AllGenes.txt	9	75	Terms found.
		...6AllGenes.txt	10	73	Terms found.	...8AllGenes.txt	13	67	Terms found.	...9AllGenes.txt	15	72	Terms found.
		...2AllGenes.txt	16	70	Terms found.	...1AllGenes.txt	21	95	Terms found.	...2AllGenes.txt	23	93	Terms found.
		...3AllGenes.txt	24	92	Terms found.	...4AllGenes.txt	25	90	Terms found.	...6AllGenes.txt	28	87	Terms found.
		...7AllGenes.txt	29	84	Terms found.	...7AllGenes.txt	30	86	Terms found.	...2AllGenes.txt	33	118	Terms found.
		...9AllGenes.txt	35	113	Terms found.	...5AllGenes.txt	43	103	Terms found.	...7AllGenes.txt	46	102	Terms found.
		...9AllGenes.txt	67	136	Terms found.	...0AllGenes.txt	69	135	Terms found.	...2AllGenes.txt	72	131	Terms found.
		...3AllGenes.txt	73	130	Terms found.	...4AllGenes.txt	75	127	Terms found.	...6AllGenes.txt	80	152	Terms found.
		...8AllGenes.txt	81	151	Terms found.	...0AllGenes.txt	86	144	Terms found.	...3AllGenes.txt	90	147	Terms found.
		...6AllGenes.txt	95	216	Terms found.	...8AllGenes.txt	99	217	Terms found.	...0AllGenes.txt	103	218	Terms found.
		...5AllGenes.txt	112	216	Terms found.	...6AllGenes.txt	113	219	Terms found.	...8AllGenes.txt	116	204	Terms found.
		...9AllGenes.txt	118	218	Terms found.	...0AllGenes.txt	120	176	Terms found.	...3AllGenes.txt	128	217	Terms found.
		...5AllGenes.txt	131	219	Terms found.	...8AllGenes.txt	135	219	Terms found.	...3AllGenes.txt	147	219	Terms found.
		...7AllGenes.txt	154	220	Terms found.	...9AllGenes.txt	3	69	No significant terms were found.	...7AllGenes.txt	12	66	No significant terms were found.
		...7AllGenes.txt	18	120	No significant terms were found.	...2AllGenes.txt	19	97	No significant terms were found.	...5AllGenes.txt	27	89	No significant terms were found.
		...8AllGenes.txt	34	115	No significant terms were found.	...0AllGenes.txt	37	112	No significant terms were found.	...1AllGenes.txt	38	110	No significant terms were found.
		...3AllGenes.txt	40	109	No significant terms were found.	...4AllGenes.txt	42	106	No significant terms were found.	...6AllGenes.txt	44	99	No significant terms were found.
		...8AllGenes.txt	57	116	No significant terms were found.	...1AllGenes.txt	70	133	No significant terms were found.	...5AllGenes.txt	77	128	No significant terms were found.
		...9AllGenes.txt	84	149	No significant terms were found.	...1AllGenes.txt	87	143	No significant terms were found.	...2AllGenes.txt	89	141	No significant terms were found.
		...4AllGenes.txt	92	215	No significant terms were found.	...5AllGenes.txt	93	220	No significant terms were found.	...7AllGenes.txt	97	220	No significant terms were found.
		...9AllGenes.txt	102	220	No significant terms were found.	...1AllGenes.txt	106	203	No significant terms were found.	...3AllGenes.txt	108	217	No significant terms were found.
		...4AllGenes.txt	110	203	No significant terms were found.	...7AllGenes.txt	115	217	No significant terms were found.	...1AllGenes.txt	121	216	No significant terms were found.
		...2AllGenes.txt	123	216	No significant terms were found.	...4AllGenes.txt	130	218	No significant terms were found.	...6AllGenes.txt	133	220	No significant terms were found.
		...9AllGenes.txt	136	189	No significant terms were found.	...0AllGenes.txt	138	203	No significant terms were found.	...1AllGenes.txt	142	217	No significant terms were found.
		...2AllGenes.txt	144	203	No significant terms were found.	...4AllGenes.txt	149	218	No significant terms were found.	...5AllGenes.txt	151	216	No significant terms were found.
		...6AllGenes.txt	152	215	No significant terms were found.
	2	Yeast			65 out of 79		0.822785
		list file	time	time	results	list file	time	time	results	list file	time	time	results
			submitted	completed			submitted	completed			submitted	completed
		...2AllGenes.txt	1	58	Terms found.	...3AllGenes.txt	4	67	Terms found.	...4AllGenes.txt	5	65	Terms found.
		...5AllGenes.txt	6	64	Terms found.	...6AllGenes.txt	7	61	Terms found.	...7AllGenes.txt	8	60	Terms found.
		...8AllGenes.txt	10	117	Terms found.	...9AllGenes.txt	12	114	Terms found.	...6AllGenes.txt	13	112	Terms found.
		...2AllGenes.txt	14	87	Terms found.	...8AllGenes.txt	15	74	Terms found.	...1AllGenes.txt	17	85	Terms found.
		...2AllGenes.txt	18	83	Terms found.	...3AllGenes.txt	19	82	Terms found.	...4AllGenes.txt	20	80	Terms found.
		...7AllGenes.txt	24	77	Terms found.	...8AllGenes.txt	25	111	Terms found.	...1AllGenes.txt	29	103	Terms found.
		...2AllGenes.txt	30	101	Terms found.	...3AllGenes.txt	33	99	Terms found.	...4AllGenes.txt	34	97	Terms found.
		...5AllGenes.txt	35	96	Terms found.	...7AllGenes.txt	36	94	Terms found.	...8AllGenes.txt	38	93	Terms found.
		...4AllGenes.txt	39	91	Terms found.	...9AllGenes.txt	40	105	Terms found.	...0AllGenes.txt	41	108	Terms found.
		...1AllGenes.txt	42	106	Terms found.	...2AllGenes.txt	60	129	Terms found.	...3AllGenes.txt	61	127	Terms found.
		...4AllGenes.txt	64	125	Terms found.	...5AllGenes.txt	65	122	Terms found.	...6AllGenes.txt	67	118	Terms found.
		...7AllGenes.txt	68	121	Terms found.	...8AllGenes.txt	76	133	Terms found.	...9AllGenes.txt	77	145	Terms found.
		...0AllGenes.txt	79	143	Terms found.	...3AllGenes.txt	82	138	Terms found.	...4AllGenes.txt	83	136	Terms found.
		...6AllGenes.txt	86	217	Terms found.	...7AllGenes.txt	89	217	Terms found.	...8AllGenes.txt	91	209	Terms found.
		...0AllGenes.txt	94	213	Terms found.	...1AllGenes.txt	96	153	Terms found.	...2AllGenes.txt	97	151	Terms found.
		...3AllGenes.txt	99	217	Terms found.	...4AllGenes.txt	101	215	Terms found.	...5AllGenes.txt	103	195	Terms found.
		...6AllGenes.txt	104	214	Terms found.	...7AllGenes.txt	106	196	Terms found.	...0AllGenes.txt	109	216	Terms found.
		...3AllGenes.txt	114	215	Terms found.	...5AllGenes.txt	118	213	Terms found.	...7AllGenes.txt	122	214	Terms found.
		...8AllGenes.txt	125	215	Terms found.	...1AllGenes.txt	130	215	Terms found.	...2AllGenes.txt	136	195	Terms found.
		...3AllGenes.txt	138	195	Terms found.	...5AllGenes.txt	140	214	Terms found.	...6AllGenes.txt	142	196	Terms found.
		...7AllGenes.txt	145	216	Terms found.	...8AllGenes.txt	147	214	Terms found.	...9AllGenes.txt	151	212	Terms found.
		...0AllGenes.txt	153	209	Terms found.	...1AllGenes.txt	156	217	Terms found.	...5AllGenes.txt	21	79	No significant terms were found.
		...6AllGenes.txt	23	76	No significant terms were found.	...9AllGenes.txt	26	89	No significant terms were found.	...0AllGenes.txt	28	109	No significant terms were found.
		...1AllGenes.txt	80	140	No significant terms were found.	...5AllGenes.txt	85	149	No significant terms were found.	...9AllGenes.txt	93	216	No significant terms were found.
		...9AllGenes.txt	108	213	No significant terms were found.	...1AllGenes.txt	111	213	No significant terms were found.	...2AllGenes.txt	112	196	No significant terms were found.
		...4AllGenes.txt	116	179	No significant terms were found.	...6AllGenes.txt	121	212	No significant terms were found.	...9AllGenes.txt	127	216	No significant terms were found.
		...0AllGenes.txt	129	216	No significant terms were found.

## Sheet: KOGroupsForAllTools
		eco/stm				eco/cce				sce/dme						eco/stm				eco/ccr				sce/dme
	Tools	Ceq	Cnode	Cor	Tot	Ceq	Cnode	Cor	Tot	Ceq	Cnode	Cor	Tot		Tools	Ceq	Cnode	Cor	Tot	Ceq	Cnode	Cor	Tot	Ceq	Cnode	Cor	Tot
	NB	0.77	0.45	457	1016	0.78	0.5	346	697	0.39	0.14	43	306		NB	0.77	0.45	457	1016	0.78	0.5	346	697	0.39	0.14	43	306
	ISO	0.91	0.91	2026		0.65	0.65	1014		0.63	0.63	534			ISO	0.91	0.91	2026		0.65	0.65	1014		0.63	0.63	534
	Gr2	0.96	0.96	2024		0.78	0.78	1012		0.73	0.73	637			Gr2	0.96	0.96	2024		0.78	0.78	1012		0.73	0.73	637
	HM	1	1	2159	3151	1	1	1061	1365	1	1	768	1664		HM	1	1	2159	3151	1	1	1061	1365	1	1	768	1664

## Sheet: Graemlin1.0Sce_Dme
	Cluster ID	Sce	Dme		Sce with UniProtID	dme with UniProtID		Sce GO term			8 out of 14	0.571429
	1	9	9		4	7		list file	time	time	results	list file	time	time	results	list file	time	time	results
	2	4	4		4	2			submitted	completed			submitted	completed			submitted	completed
	3	3	3		1	4		...1SubNet#4.txt	326	419	Terms found.	...1SubNet#1.txt	331	419	Terms found.	...SubNet#23.txt	333	420	Terms found.
	4	4	4		4	2		...SubNet#15.txt	345	419	Terms found.	...SubNet#12.txt	349	420	Terms found.	...SubNet#10.txt	352	418	Terms found.
	5	4	4		2	4		...1SubNet#9.txt	353	418	Terms found.	...1SubNet#8.txt	355	419	Terms found.	...1SubNet#6.txt	323	419	No known genes were found.
	6	5	5		1	6		...1SubNet#5.txt	324	418	No significant terms were found.	...1SubNet#3.txt	327	420	No known genes were found.	...1SubNet#2.txt	329	420	No significant terms were found.
	7	4	4		3	3		...SubNet#24.txt	332	418	No known genes were found.	...SubNet#22.txt	335	419	No known genes were found.	...SubNet#21.txt	337	420	No significant terms were found.
	8	7	7		4	5		...SubNet#20.txt	338	400	No known genes were found.	...SubNet#19.txt	339	419	No known genes were found.	...SubNet#18.txt	340	419	No known genes were found.
	9	5	5		4	3		...SubNet#17.txt	341	420	No known genes were found.	...SubNet#16.txt	344	420	No known genes were found.	...SubNet#14.txt	347	418	No significant terms were found.
	10	6	6		6	2		...SubNet#13.txt	348	419	No known genes were found.	...SubNet#11.txt	351	419	No significant terms were found.	...1SubNet#7.txt	356	420	No significant terms were found.
	11	3	3		2	3
	12	3	3		3	2		Fly			3 out of 10	0.3
	13	2	2		2	4		list file	time	time	results	list file	time	time	results	list file	time	time	results
	14	4	4		5	2			submitted	completed			submitted	completed			submitted	completed
	15	5	5		1	4		...2SubNet#6.txt	570	992	Terms found.	...2SubNet#1.txt	579	1006	Terms found.	...2SubNet#8.txt	606	1005	Terms found.
	16	3	3		2	4		...2SubNet#5.txt	572	989	No significant terms were found.	...2SubNet#4.txt	573	1006	No significant terms were found.	...2SubNet#3.txt	575	1007	No known genes were found.
	17	2	2		1	4		...2SubNet#2.txt	576	1021	No significant terms were found.	...SubNet#24.txt	580	989	No known genes were found.	...SubNet#23.txt	581	1007	No known genes were found.
	18	2	2		3	2		...SubNet#22.txt	583	1006	No significant terms were found.	...SubNet#21.txt	585	1021	No significant terms were found.	...SubNet#20.txt	586	705	No known genes were found.
	19	1	1					...SubNet#19.txt	588	1007	No known genes were found.	...SubNet#18.txt	590	1006	No known genes were found.	...SubNet#17.txt	592	1007	No known genes were found.
	20	2	2					...SubNet#16.txt	595	1007	No known genes were found.	...SubNet#15.txt	596	1006	No known genes were found.	...SubNet#14.txt	598	989	No known genes were found.
	21	4	4					...SubNet#13.txt	599	993	No known genes were found.	...SubNet#12.txt	600	1021	No significant terms were found.	...SubNet#11.txt	602	1007	No known genes were found.
	22	3	3					...SubNet#10.txt	603	989	No known genes were found.	...2SubNet#9.txt	605	992	No significant terms were found.	...2SubNet#7.txt	607	1021	No known genes were found.
	23	3	3					No known genes exist in UniProtIDsInPPInet1SubNet#13.txt .
								No known genes exist in UniProtIDsInPPInet1SubNet#18.txt .
								No known genes exist in UniProtIDsInPPInet1SubNet#22.txt .
								No known genes exist in UniProtIDsInPPInet1SubNet#19.txt .
								No known genes exist in UniProtIDsInPPInet1SubNet#17.txt .
								No known genes exist in UniProtIDsInPPInet1SubNet#16.txt .
								No known genes exist in UniProtIDsInPPInet1SubNet#3.txt .
								All jobs are done.
								All results are available in this tar file. The above table is included as index.html at the top level.

[truncated: 2 more sheets: Graemlin1.0ECO_STMGOResults, Graemlin1.0CCR_ECOGOresults]
